1 **Integrative Network and Brain Expression Analysis reveals Mechanistic Modules**  
2 **in Ataxia**

3  
4 Ilse Eidhof,<sup>1</sup> Bart P van de Warrenburg,<sup>2,\*</sup> and Annette Schenck<sup>1,\*</sup>

5  
6 1. Department of Human Genetics, Donders Institute for Brain, Cognition, and Behavior, Radboud  
7 university medical centre, Nijmegen, The Netherlands.

8 2. Department of Neurology, Donders Institute for Brain, Cognition, and Behavior, Radboud  
9 university medical centre, Nijmegen, The Netherlands.

10

11 **Corresponding authors:**

12 Bart P van de Warrenburg

13 Department of Neurology, Radboudumc

14 Reinier Postlaan 4

15 6525GC Nijmegen, the Netherlands

16 Tel: 0031243616600

17 E-mail address: [Bart.vandeWarrenburg@radboudumc.nl](mailto:Bart.vandeWarrenburg@radboudumc.nl)

18

19 Annette Schenck

20 Department of Human Genetics, Radboudumc

21 Geert Grooteplein Zuid 10

22 6525GA Nijmegen, the Netherlands

23 Tel: 0031243610868

24 E-mail address: [Annette.Schenck@radboudumc.nl](mailto:Annette.Schenck@radboudumc.nl)

25 **Abstract**

26 **Background:** Genetic forms of ataxia are a heterogenous group of degenerative diseases of the  
27 cerebellum. Many causative genes have been identified, but a systematic investigation of these genes  
28 to understand ataxia pathophysiology has not been performed.

29 **Methods:** A manually curated catalogue of 71 genes involved in disorders with progressive ataxias  
30 as a major clinical feature was subjected to an integrated gene ontology (GO), protein network, and  
31 brain gene expression profiling analysis.

32 **Results:** We found that ataxia genes operate in networks with significantly enriched protein  
33 connectivity, demonstrating coherence on a global level, independent of inheritance mode.  
34 Moreover, elevated expression specifically in the cerebellum predisposes to ataxia. Genes expressed  
35 in this pattern are significantly overrepresented among ataxia genes and are enriched for ion  
36 homeostasis/synaptic functions. The majority of ataxia genes, however, does not show elevated  
37 cerebellar expression that could account for region-specific degeneration. For these, we identified  
38 defective cellular stress responses as a major common biological theme, suggesting that the defense  
39 pathways against stress are more critical to maintain cerebellar integrity than integrity of other brain  
40 regions. Approximately half of the ataxia genes, mostly part of the stress module, show higher  
41 expression at embryonic stages, which argues for a developmental predisposition.

42 **Conclusion:** Genetic defects in ataxia predominantly affect neuronal homeostasis, to which the  
43 cerebellum appears to be excessively susceptible. Based on the identified modules, it is conceivable  
44 to propose common therapeutic interventions that target deregulated calcium and ROS levels, or  
45 mechanisms that can decrease the harmful downstream effects of these deleterious insults.

## 47 **Introduction**

48 Genetic cerebellar ataxias are a group of disabling disorders that share progressive incoordination of  
49 movement due to dysfunction and degeneration of the cerebellum as their main hallmark<sup>1</sup>. The  
50 advent of next-generation sequencing technologies greatly advanced the identification of genes  
51 involved in ataxia<sup>2</sup>. However, despite the increasing number of genes identified, treatment attempts  
52 are still limited to relieving symptoms and do not target the underlying biological mechanisms.  
53 Development of effective therapies is hampered by an enormous genetic heterogeneity, the rarity of  
54 some the subtypes, and the limited knowledge of biological processes in which ataxia genes exert  
55 their function. Identification of shared biological modules between ataxia genes would provide a  
56 basis for therapeutic strategies that could be applied to larger cohorts of ataxia patients, in spite of  
57 their heterogeneous genotypic background.

58 In recent years, efforts have been made to identify common denominators of genetic ataxias.  
59 A number of ataxia genes were found to share interaction partners at protein level and to be involved  
60 in processes such as RNA splicing, regulation of transcription, and cell cycle<sup>2-5</sup>. When impaired in  
61 animal models, these processes lead to neurodegeneration, suggesting that these shared biological  
62 pathways maintain the integrity of the cerebellum and its connections<sup>3</sup>. Nevertheless, previous  
63 studies focused primarily on protein networks among specific ataxia genes and subtypes, and they  
64 did not systematically probe the influence of gene expression on cerebellar pathology<sup>2-5</sup>.

65 In this study, we systematically analyze the genes to date implicated in cerebellar ataxia, their  
66 functional biological pathways, and their expression in the developing human brain. Our integrative  
67 study identifies common denominators that underlie progressive cerebellar degeneration and ataxia,  
68 including a cerebellum-specific mechanism affected in a subgroup of ataxia disorders that may

69 account for region-specific degeneration and defective stress defense pathways as underlying  
70 mechanism to the large majority of ataxia disorders to which the cerebellum is in particular sensitive.

## 71 **Materials and methods**

### 72 **Cerebellar Ataxia gene selection and classification**

73 The Human Phenotype Ontology database<sup>6</sup> (download 11/2015) was used to search for genes  
74 associated with ataxia. A list of 347 genes was obtained and manually curated using PubMed and  
75 OMIM. Genes associated with progressive cerebellar ataxia as prominent clinical manifestation,  
76 either in isolation or as part of a more complex phenotype, were included. Primary metabolic  
77 disorders, genes associated with cerebellar hypoplasia, and genes inconsistently associated with  
78 cerebellar ataxia were excluded.

### 79 **Gene Ontology analysis**

80 The webtool G-profiler<sup>7</sup> (rev 1536, build 02/2016) was used to perform Gene-Ontology (GO)  
81 analysis of 4 categories of ataxia genes (all genes, dominant genes, recessive genes, polyQ genes; the  
82 latter refers to the group of dominant ataxias genes that, when mutated, carry a coding CAG repeat  
83 expansion that leads to polyglutamine expansion in the protein). For this study, we only considered  
84 GO terms (Biological Process, Molecular Function and Cellular Component) that were significantly  
85 enriched after correction for multiple testing (Bonferroni test,  $p < 0.05$ ). GO analysis for the  
86 developmental transcriptome data of BrainSpan was performed using the filtered gene-list (average  
87 RPKM  $> 0.05$  over all developmental stages) as background.

### 88 **Enrichment analysis**

89 Enrichment scores for GO-terms were calculated as followed:  $(a/b)/[(c - a)/(d - b)]$ , where  $a$  is the  
90 number of genes in the ataxia category associated with that GO-term,  $b$  is the total number of genes  
91 in the ataxia category,  $c$  is the total number of genes in the genome associated with that GO-term or,  
92 for GO analysis of brainspan data, the total number of genes associated with that GO-term remaining  
93 after filtering out low expressed genes from BrainSpan data and  $d$  is the total number of annotated  
94 human genes present in Ensembl (20,313 genes) or, for GO analysis of brainspan data, the total  
95 number of genes remaining after filtering out low expressed genes from BrainSpan data (16,956  
96 genes).

## 97 **Protein-protein interaction network**

98 Protein-protein interactions (PPI) between CA genes were obtained from GeneMANIA, HPRD and  
99 BioGrid and included physical interactions, predicted interactions, shared protein domains, and  
100 pathways<sup>8-10</sup>. All interactions were combined and assembled in a reference network using  
101 Cytoscape<sup>11</sup> (v3.1.1.) and duplicates were removed from the reference network.

## 102 **Physical interaction enrichment (PIE) score**

103 We used the PIE algorithm to account for biases in the number of reported protein interactions for  
104 disease-associated genes in the generated reference PPI network<sup>12</sup>. PIE scores and associated p-  
105 values were calculated against 10,000 random protein groups obtained by number-matched sub-  
106 samplings selected from the reference PPI network for all four ataxia gene categories, as previously  
107 described<sup>13 14</sup>.

## 108 **BrainSpan developmental transcriptome analysis**

109 The publically available developmental transcriptome RNA sequencing (RNA seq) data from the  
110 Human BrainSpan atlas was used for ataxia gene expression analysis. BrainSpan provides RNA seq  
111 count data represented as reads per kilobase per million mapped reads (RPKM) of 11 targeted  
112 neocortical human brain regions and 5 targeted non-neocortical brain regions. Details on samples,  
113 sequencing protocols and RNA expression analysis can be found at the brainspan website  
114 (<http://www.brainspan.org>). First, low expressed genes, with an average expression <0.05 RPKM  
115 over brain developmental stages and regions, were filtered out. Data was then binned into nine  
116 stages, spanning important developmental milestones of the prenatal and postnatal human brain.  
117 EdgeR<sup>15</sup> (version 3.16.5) and Limma<sup>16</sup> (version 3.30.7), provided by the online service  
118 Bioconductor, were used to identify the differentially expressed genes between the 16 brain regions  
119 separately over the developmental stages. Genes were considered to be differentially expressed  
120 between two brain regions if the adjusted P-value passed the <0.05 threshold. Graphpad Prism 5.0  
121 contingency tables and Chi-square with Yates correction (two-tailed) tests were used to calculate  
122 whether ataxia gene expression was significantly enriched in the cerebellum compared to the rest of  
123 the brain. GENE-E (version 3.0.215, [www.broadinstitute.org](http://www.broadinstitute.org)) was utilized to hierarchically cluster  
124 average RPKM values of ataxia genes in the cerebellum over the nine defined developmental stages.

## 125 **Results**

### 126 **A systematic catalogue of genes associated with progressive Cerebellar Ataxia**

127 We generated a manually curated systematic catalogue of 103 disorders consistently associated with  
128 progressive cerebellar ataxia, corresponding to 71 annotated protein-coding genes (**Table S1**). Of the  
129 71 genes that met our criteria, mutations in 42 of the genes follow recessive inheritance and  
130 mutations in 31 of the genes follow dominant inheritance. Two genes, *SPTBN2* and *AFG3L2*, have

131 been described in both dominant and recessive ataxia. Generally, mutations associated with recessive  
132 ataxia are loss of function mutations, whereas dominant ataxias can be caused by a combination of  
133 gain and/or loss of function mutations. Several genetic ataxias are caused by unstable repeat  
134 expansions that can occur in noncoding and coding regions of the genome. Eight of these (*ATXN1*,  
135 *ATXN2*, *ATXN3*, *ATXN7*, *ATXN8*, *CACNA1A*, *TBP* and *ATNI*) contain/represent translated  
136 trinucleotide repeats that encode for polyglutamine (polyQ) residues and follow dominant  
137 inheritance.

### 138 **Genes involved in ataxia function in common biological processes**

139 Differences in the type of mutations and phenotypes between recessive and dominant ataxias suggest  
140 that in spite of shared clinical features, different biological mechanisms might underlie these  
141 disorders<sup>2 5</sup>. To examine whether recessive, dominant and polyQ ataxia genes are associated with  
142 distinct biological functions, GO analysis was performed on the three gene categories. Recessive  
143 ataxia genes were significantly enriched for DNA metabolic processes ( $p=0.017$ ), DNA-dependent  
144 DNA replication ( $p=0.038$ ), DNA repair ( $p=4.2e^{-4}$ ), cellular response to stress ( $p=0.002$ ), and  
145 mitochondrion ( $p=0.025$ ) (**Fig 1A**). Dominant ataxia genes were significantly enriched for nuclear  
146 matrix ( $p=0.023$ ), somatodendritic compartment ( $p=0.008$ ) and dendrite ( $p=0.009$ ) (**Fig 1B**). Ataxia  
147 genes encoding PolyQ expansions were significantly enriched for regulation of cellular biosynthetic  
148 process ( $p=0.047$ ), nuclear periphery ( $p=8.57e^{-5}$ ), nuclear matrix ( $p=3.81e^{-5}$ ) and nuclear inclusion  
149 body ( $p=0.012$ ) (**Fig 1C**). Despite these differences, the shared clinical hallmarks of genetic ataxias  
150 suggest that ataxia genes/proteins might affect common biological pathways or processes. To  
151 identify such common biological themes, we also analyzed the combined ataxia gene catalogue. We  
152 found a significant enrichment for most of the GO terms revealed by the separate analyses of genes  
153 underlying ataxia subtypes, including cellular response to stress ( $p=0.003$ ) and DNA repair



154 (p=0.001) (recessive), dendrite (p=0.003) (dominant), and nuclear inclusion body (p=0.029) (PolyQ)  
155 (**Fig 1D**). Interestingly, analysis of the contribution of recessive and dominantly inherited ataxia  
156 genes to the identified GO terms revealed a shared contribution to nearly all processes (**Fig 1D**),  
157 supporting an overlapping molecular pathology underlying both dominant and recessive ataxias.  
158 Moreover, several GO terms, such as those linked to calcium ion transmembrane transport  
159 (p=0.020), neuron projection (p=0.004), and adult walking behavior (p=0.014), were only  
160 highlighted if the analysis was applied to the complete catalogue of ataxia genes and might be more  
161 representative of the shared hallmarks between recessive and dominant progressive cerebellar  
162 ataxias.

### 163 **Genes involved in ataxia show high connectivity on the protein level**

164 Physical and functional interactions of proteins provide the basis of biological pathways and are  
165 crucial to understand cellular function. We evaluated whether our catalogue of ataxia proteins shows  
166 significant molecular connectivity. For this, we collected PPI data from three large databases and  
167 combined these into a reference network (**Fig 2A**). We found that 46 of the proteins physically  
168 interacted with other proteins present in the ataxia catalogue. Of these 46 proteins, 17 proteins were  
169 connected in small modules (pairs, tri- and hexamers), whereas 29 proteins formed a single major  
170 network with 30 interactions (**Fig 2A**). Interestingly, within these modules and networks, proteins  
171 associated with recessive, dominant and polyQ progressive ataxia are jointly represented,  
172 demonstrating a biological overlap regardless of inheritance type or mutational mechanism (**Fig 2A**

173 To assess the significance of the identified connectivity, PIE scores and associated p-values  
174 were calculated for all, and separately for recessive, dominant and polyQ ataxia proteins. This  
175 analysis revealed that ataxia proteins as a whole group interact 2-fold more than randomly expected  
176 (P<0.001) (**Fig 2B**). Recessive ataxia proteins interacted 2.1-fold more (p<0.001), dominant ataxia

177 proteins interacted 2.8-fold more ( $p < 0.001$ ), and polyQ-associated ataxia proteins interacted 3-fold  
178 more ( $p < 0.05$ ) (**Fig 2B**). Thus, ataxia proteins are significantly interconnected.

179 Since interactions between proteins underlie biological processes and pathways, we  
180 continued examining whether these represent specific biological processes. Individual small protein  
181 modules were significantly enriched for processes such as calcium ion homeostasis ( $p = 0.001$ ) and  
182 calcium ion transmembrane transport ( $p = 0.024$ ), ATP-dependent peptidase activity, m-AAA  
183 complex ( $p = 4.27e^{-6}$ ), unfolded protein binding ( $p = 0.024$ ), potassium ion transport ( $p = 0.024$ ), and  
184 potassium channel activity ( $p = 0.007$ ) (**Fig 2A, left side**). The large module within the ataxia  
185 interactome was significantly enriched for DNA repair ( $p = 3.23e^{-5}$ ), cellular response to stress  
186 ( $p = 0.020$ ), and nuclear inclusion body ( $p = 0.001$ ) (**Fig 2A, right side**). Together, these results  
187 illustrate that ataxia proteins function in common biological networks and processes.

### 188 **A subset of ataxia genes shows high relative expression specifically in the cerebellum**

189 The basis for the preferential regional vulnerability of neurons in the cerebellum in genetic ataxias is  
190 mostly unknown. Temporal and spatial patterns of ataxia gene expression in the brain may  
191 significantly contribute to specific or preferential cerebellar degeneration when disturbed. To address  
192 this, we turned to the publicly available BrainSpan Transcriptional Atlas of the Developing Human  
193 Brain, as resource. After exclusion of low expressed genes, a transcription matrix of 16,956 genes  
194 representing the 16 brain regions was left that was binned into nine different developmental stages  
195 (**Fig 3A**). We then calculated for each of the 16,956 genes per developmental period whether it was  
196 differentially expressed in the cerebellum, compared pairwise to any of the other 15 brain regions.  
197 From the resulting matrix, the ataxia genes were extracted and the percentage of ataxia genes  
198 differentially expressed (adj.  $p < 0.05$ ) in the cerebellum compared to one or more other brain regions  
199 was calculated and visualized in a heatmap (**Fig 3B**). Of note, the expression levels of three ataxia

200 genes, *TGM6*, *PIK3R5* and *MTPAP*, did not pass the threshold of very low expressed genes and were  
201 therefore excluded from further analyses. The expression of most ataxia genes in the cerebellum was  
202 not different from any of the other 15 brain regions. However, the vast majority of those ataxia genes  
203 that did show differential expression to other brain regions, did so to all 15 of them. Their high  
204 relative expression level was specific to the cerebellum, suggesting their distinct requirement in this  
205 region of the brain. Interestingly, this pattern showed a sharp onset at birth, suggesting that these  
206 genes serve cerebellar function specifically at postnatal stages (**Fig 3B**).

### 207 **Elevated cerebellar-specific expression predisposes to ataxia**

208 We continued determining whether elevated relative expression in the cerebellum predisposes to  
209 ataxia. To address this, we calculated whether the amount of ataxia genes that were specifically  
210 elevated in the cerebellum for each developmental stage was higher than randomly expected,  
211 considering the genome-wide frequency of cerebellar elevated genes. Ataxia genes were more  
212 frequently elevated in the cerebellum during the postnatal stages 5-9 (infancy:  $p < 0.001$ , early  
213 childhood:  $p < 0.001$ , late childhood:  $p < 0.001$  and teenager:  $p < 0.01$ ) than randomly expected (**Fig**  
214 **3C**). The following genes were specifically elevated in the cerebellum during one or more of the  
215 analyzed developmental stages: *ADCK3*, *ATM*, *ATN1*, *CACNA1A*, *DNMT1*, *GRID2*, *GRM1*, *ITPRI*,  
216 *KCNC3*, *KCND3*, *SPTBN2*, *SYNE1* and *TRPC3* (**Table S1**). To further examine whether a specific  
217 mode of inheritance or mutational mechanism was underlying this group of genes, the analysis was  
218 repeated for the recessive, dominant and polyQ ataxia gene categories. Also here, the expression of  
219 genes involved in either of these three categories was enriched in the cerebellum during postnatal  
220 development stages (**Fig 3D-F**), suggesting that all of them contribute to the finding of cerebellum-  
221 specific postnatal enrichment of ataxia gene expression.

222 Finally, we asked whether the genes that were not specifically elevated in the cerebellum

223 during one of the nine developmental stages, were specifically elevated in one of the other 15 brain  
224 regions. We found that a small group of ataxia genes was specifically elevated in either the thalamus  
225 (*GBA2*, *UCHL1*, *PRICKLE1* and *ANO10*) or striatum (*CCDC88C* and *PDYN*) during certain  
226 developmental stages compared to rest of brain. Not a single ataxia gene was significantly elevated  
227 in one of the remaining 13 specific brain regions.

228 In summary, systematic analyses of brain expression across brain regions revealed that the  
229 expression of a subgroup of ataxia genes is specifically enriched in the postnatal cerebellum, likely  
230 driving the pathological features of these disorders.

### 231 **Cerebellar-specific expression patterns separate ataxia genes in distinct biological** 232 **modules**

233 We next asked which functional biological modules are underlying the identified group of genes  
234 with cerebellar-specific expression. GO term analysis was performed on the lists of ataxia genes that  
235 showed enriched cerebellar expression during one or more of the developmental stages and ataxia  
236 genes that did not (**Table S1**). This revealed that ataxia genes that were specifically elevated in the  
237 cerebellum during one of the developmental stages were significantly enriched for neuronal and ion  
238 related processes such as: neuron apoptotic process ( $p=0.046$ ), hindbrain morphogenesis ( $p=0.008$ ),  
239 regulation of cytosolic calcium ion concentration ( $p=0.040$ ), synapse part ( $p=0.023$ ), and passive  
240 transmembrane transporter activity ( $p=3.53e^{-4}$ ) (**Fig 3G**). Ataxia genes that were not specifically  
241 elevated in the cerebellum during one of the developmental stages were significantly enriched for  
242 processes such as: DNA repair ( $p=0.004$ ), cellular response to stress ( $p=0.023$ ) and nuclear inclusion  
243 body ( $p=0.035$ ) (**Fig 3G**).

244 **Temporal gene expression patterns in the cerebellum cluster genes involved in**  
245 **progressive ataxia into two groups**

246 Finally, we also explored developmental expression profiles of ataxia genes in the cerebellum over  
247 time, to examine whether this provides further clues about dependence of the cerebellum on certain  
248 biological processes during specific stages of development (**Fig 4A, B**). We hierarchically clustered  
249 the temporal expression patterns of ataxia genes in the cerebellum over the nine developmental  
250 stages, which unbiasedly separated the genes in two distinct clusters (**Fig 4B**). Genes present in  
251 cluster 1 showed significant higher expression during prenatal stages compared to genes in cluster 2,  
252 and genes present in cluster 2 showed significant higher expression during postnatal stages  
253 compared to genes present in cluster 1 (**Fig 4A**). Recessive, dominant and polyQ associated ataxia  
254 genes contributed randomly to the two clusters (data not shown). However, genes expressed higher  
255 during prenatal stages (cluster 1) were enriched for DNA repair ( $p=0.031$ ), whereas genes with  
256 higher postnatal expression (cluster 2) were enriched for processes related to the cellular component  
257 synapse ( $p=0.019$ ), calcium ion transmembrane transport ( $p=0.012$ ), and metal ion homeostasis  
258 ( $p=0.042$ ) (**Fig 4C**). Ataxia genes can thus be distinguished based on their temporal expression  
259 profiles in the cerebellum, which links to specific biological processes.

260 **Discussion**

261 We have here systematically mapped shared molecular pathways, processes and expression  
262 characteristics among ataxia causing genes, to increase our understanding of the biology of genetic  
263 ataxias and to identify mechanistic hubs that can serve as targets for therapeutic interventions. In  
264 comparison to previous studies<sup>2-5</sup>; we generated a manually curated catalogue of genes involved in  
265 genetic ataxia and performed analyses across dominant and recessive forms of the disorder.

266 Furthermore, we applied a strategy that integrated ataxia gene expression in the developing human  
267 brain, gene ontology, and protein interaction network analysis, to get a comprehensive  
268 understanding of the vulnerability of the cerebellum and the molecular modules and processes  
269 affected in genetic ataxias.

270 Data in this study highlight the different biological processes that are implicated in recessive,  
271 dominant and polyQ ataxias, with recessive ataxias linked to cellular response to stress and DNA  
272 repair related processes; dominant ataxias to dendrite related processes; and polyQ ataxias to nuclear  
273 inclusion body. The deleterious effect of the type of mutation on the protein, the expression timing  
274 profile, specificity and levels of the affected protein in the cerebellum, and the sensitivity of the  
275 cerebellum to disruption of these processes might explain these different findings. Despite of this,  
276 we found a shared contribution of recessive and dominant ataxia genes to nearly all biological  
277 processes, while processes such as calcium ion transmembrane transport were only enriched when  
278 applying GO analysis to the complete ataxia gene panel.

279 We found that ataxia genes operate in networks with significantly enriched protein  
280 connectivity, demonstrating global coherence independent of inheritance mode or mutational  
281 mechanism. Notably, polyQ proteins interacted directly with other non-polyQ dominant and  
282 recessive ataxia proteins. This indicates that, in addition to common toxic gain-of-function  
283 mechanisms<sup>17</sup> such as the formation of nuclear inclusion bodies, the disruption of the biological  
284 processes that these genes operate in likely contributes to the disease pathogenesis. This notion  
285 derived from our systematic analysis is supported by gene-focused studies, e.g. of mice models of  
286 SCA1, where ATXN1 loss-of-function phenotypes were very similar to ATXN1 gain-of-function  
287 phenotypes, and of SCA17 models demonstrating that impaired transcriptional activity of polyQ-  
288 expanded TBP contributes to disease pathogenesis<sup>18-20</sup>. Together, our findings strongly support an

289 overlapping molecular pathology between recessive and dominant ataxia subtypes.

290 The identified protein modules represent different biological processes and ataxia proteins  
291 can broadly be separated in two themes: a large stress module and smaller ion homeostasis/synapse  
292 modules. The common end-point of these modules is progressive degeneration of the cerebellum,  
293 and analysis of ataxia gene expression in the developing human brain suggested that these two  
294 modules might contribute differently to cerebellar vulnerability, depending on their specific and  
295 temporal cerebellar expression pattern (**Fig 5**).

296 Brain expression analysis demonstrated that elevated gene expression specifically in the  
297 postnatal cerebellum predisposes to ataxia. Genes with this pattern of expression are significantly  
298 overrepresented among ataxia genes. The normally high gene activity levels may explain the  
299 specific vulnerability of the cerebellum to deleterious mutations in these genes. Interestingly, the  
300 corresponding genes encode ion channels, calcium receptors, calcium-activated proteins enriched  
301 for transmembrane transporter activity, and regulators of cytosolic calcium ion concentration. Most  
302 of them are part of the smaller ion homeostasis/synapse module we identified (**Fig 3**). The  
303 cerebellum contains a unique neuronal cell type, the Purkinje cell (PC), that is central to ataxia  
304 pathobiology. PCs might be particularly vulnerable for alterations in ion homeostasis due to their  
305 extensive dendritic arbor that exhibit intense and highly regulated firing properties<sup>21-23</sup>. The striking  
306 complexity of PC firing regulates sensorimotor integration and is highly dependent on calcium  
307 channels and calcium-activated potassium channels<sup>21</sup>. In ataxia models, PCs show reduced firing  
308 rate and loose intracellular calcium buffers, even before the onset of clinical symptoms and PC  
309 degeneration<sup>17 24</sup>. Reduced PC excitation enhances the excitability of efferent deep cerebellar nuclei  
310 neurons and this is sufficient to cause cerebellar ataxia even in the absence of PC degeneration<sup>25</sup>.  
311 This shows that calcium homeostasis in PCs is crucial for proper sensorimotor integration and

312 disruption of these processes likely affects PC firing properties, eventually leading to cerebellar  
313 degeneration and the onset of ataxia.

314 Calcium is also an important messenger in intracellular signaling pathways, proteostasis  
315 mechanisms at ER and Golgi membranes, and mitochondrial activity<sup>26 27</sup>. The metabolic activity of  
316 PCs is high<sup>28</sup>. Deficits in neuronal energy production and intracellular organelle systems that  
317 influence ion fluxes may thus be further factors that account for increased vulnerability of PCs. The  
318 energy provided for metabolism is provided by mitochondrial oxidative phosphorylation in the form  
319 of adenosine triphosphate. Increased calcium uptake by mitochondria leads to extensive oxidative  
320 phosphorylation and overproduction of Reactive Oxygen Species (ROS)<sup>26 27</sup>. ROS overproduction in  
321 turn can lead to detrimental oxidative modifications of lipids, proteins and nucleic acids<sup>29 30</sup>.  
322 Interestingly, the large identified protein module is enriched for the cellular stress response, and  
323 proteins present in this module are among others involved in mitochondrial maintenance, DNA  
324 repair, unfolded protein response, and regulation of apoptotic and autophagic processes. We found  
325 that overall, these genes were not more elevated in the cerebellum during any of the analyzed  
326 developmental stages. Thus, elevated cerebellar gene expression cannot account for preferential  
327 cerebellar degeneration. This suggests that, compared to other neuronal cell types, the PCs might be  
328 more vulnerable to insults related to a distorted cellular stress response. Interestingly, approximately  
329 half of the cellular stress response genes show higher expression during embryonic stages, arguing  
330 for a developmental predisposition in these cases.

331 Ataxia genes with a function in DNA repair were abundantly represented in the stress module  
332 (**Fig 3**). DNA breaks arising from oxidative damage are a major threat for the genome stability of  
333 mature post-mitotic neurons. They are usually repaired by base excision repair and single strand  
334 break repair (SSBR)<sup>31</sup>. Interestingly, genetic ataxias such as SCAN1 and AOA1, are associated with



335 DNA SSBR deficiencies, and animal models of these show increased sensitivity to ROS<sup>28 31</sup>. The  
336 genes mutated in these disorders, *TDPI* and *APTX*, do not show enriched cerebellar expression  
337 during any of the nine analyzed developmental stages, which may indicate that SSBR is a key  
338 homeostatic process required in PCs for reasons unrelated to expression, such as their high  
339 metabolic activity, oxidative load, and intrinsic firing properties. There is also a distinct subset of  
340 genes implicated in recessive ataxias that are involved in Double Strand Break (DSB) repair. Double  
341 stranded DNA breaks commonly occur during rapid proliferation of CNS development and are less  
342 likely to occur in the matured nervous system<sup>32</sup>. The cerebellum might be in particular vulnerable to  
343 disruption of DSB repair due to its development up until the first postnatal years, that will lead to  
344 the formation of the most abundant cell type in the central nervous system: the cerebellar granule  
345 neurons<sup>28</sup>. This postnatal period of rapid and massive cell proliferation may generate replication  
346 stress-associated DNA damage that might affect the cerebellar granule neurons, and indirectly other  
347 cerebellar cell types such as the PCs to which they signal<sup>28</sup>. Interestingly, ATM, a kinase that is  
348 involved in detection of DSBs and is mutated in ataxia telangiectasia (AT), shows enriched  
349 expression in the cerebellum exactly during this postnatal developmental period. Since ATM is  
350 involved in DSB-induced apoptotic signaling, dysfunctional neurons may fail to be efficiently  
351 eliminated in the early AT cerebellum, and degenerate only later on<sup>31 33 34</sup>. This is in agreement with  
352 the early neurological problems and loss of the cerebellar granule neurons, the molecular cell layer,  
353 and PCs in AT<sup>31 35 36</sup>. Nonetheless, since ROS-induced DNA damage can also include DSBs and  
354 antioxidant treatment can promote the survival of cultured ATM-deficient PCs, DSB repair might  
355 also be required for cerebellar maintenance<sup>31 37</sup>. Therefore, DSB repair is likely a key homeostatic  
356 process that maintains PC integrity.

357 In conclusion, while a number of molecular processes are involved in progressive cerebellar ataxia  
358 pathology, these intersect and form a common end-point: disrupted neuronal homeostasis, to which  
359 the cerebellum is either exclusively susceptible, or more than other brain regions. More experimental  
360 data are required to understand the dependence of the cerebellum on different aspects of neuronal  
361 homeostasis, such as calcium signaling, ROS, and DNA repair, particularly in absence of region-  
362 specific expression levels. However, based on the here identified biological themes, it seems  
363 conceivable to propose therapeutic interventions that target deregulated calcium and ROS levels, or  
364 mechanisms that can decrease the harmful downstream effects of these deleterious insults.

## 365 **Acknowledgements**

366 We thank P. Cizek for the PIE score script and C. Gilissen for advice on the expression analysis.  
367 This research was supported by the E-RARE-3 Joint Transnational Call grant “Preparing therapies  
368 for autosomal recessive ataxias” (PREPARE; ZonMW 9003037604 to B.v.d.W. and A.S.) and by a  
369 Radboud university medical centre junior researcher grant.

## 370 **References**

- 371 1. Jayadev S, Bird TD. Hereditary ataxias: overview. *Genet Med* 2013;15(9):673-83. doi:  
372 10.1038/gim.2013.28
- 373 2. Didonna A, Opal P. Advances in Sequencing Technologies for Understanding Hereditary Ataxias:  
374 A Review. *JAMA Neurol* 2016;73(12):1485-90. doi: 10.1001/jamaneurol.2016.3097
- 375 3. Lim J, Hao T, Shaw C, et al. A protein-protein interaction network for human inherited ataxias  
376 and disorders of Purkinje cell degeneration. *Cell* 2006;125(4):801-14. doi:  
377 10.1016/j.cell.2006.03.032

- 378 4. Bettencourt C, Ryten M, Forabosco P, et al. Insights from cerebellar transcriptomic analysis into  
379 the pathogenesis of ataxia. *JAMA Neurol* 2014;71(7):831-9. doi:  
380 10.1001/jamaneurol.2014.756
- 381 5. Smeets CJ, Verbeek DS. Cerebellar ataxia and functional genomics: Identifying the routes to  
382 cerebellar neurodegeneration. *Biochim Biophys Acta* 2014;1842(10):2030-38. doi:  
383 10.1016/j.bbadis.2014.04.004
- 384 6. Kohler S, Vasilevsky NA, Engelstad M, et al. The Human Phenotype Ontology in 2017. *Nucleic  
385 Acids Res* 2017;45(D1):D865-D76. doi: 10.1093/nar/gkw1039
- 386 7. Reimand J, Arak T, Vilo J. g:Profiler--a web server for functional interpretation of gene lists  
387 (2011 update). *Nucleic Acids Res* 2011;39(Web Server issue):W307-15. doi:  
388 10.1093/nar/gkr378
- 389 8. Montojo J, Zuberi K, Rodriguez H, et al. GeneMANIA: Fast gene network construction and  
390 function prediction for Cytoscape. *F1000Res* 2014;3:153. doi:  
391 10.12688/f1000research.4572.1
- 392 9. Keshava Prasad TS, Goel R, Kandasamy K, et al. Human Protein Reference Database--2009  
393 update. *Nucleic Acids Res* 2009;37(Database issue):D767-72. doi: 10.1093/nar/gkn892
- 394 10. Chatr-Aryamontri A, Oughtred R, Boucher L, et al. The BioGRID interaction database: 2017  
395 update. *Nucleic Acids Res* 2017;45(D1):D369-D79. doi: 10.1093/nar/gkw1102
- 396 11. Killcoyne S, Carter GW, Smith J, et al. Cytoscape: a community-based framework for network  
397 modeling. *Methods Mol Biol* 2009;563:219-39. doi: 10.1007/978-1-60761-175-2\_12
- 398 12. Sama IE, Huynen MA. Measuring the physical cohesiveness of proteins using physical  
399 interaction enrichment. *Bioinformatics* 2010;26(21):2737-43. doi:  
400 10.1093/bioinformatics/btq474

- 401 13. Oortveld MA, Keerthikumar S, Oti M, et al. Human intellectual disability genes form conserved  
402 functional modules in *Drosophila*. *PLoS Genet* 2013;9(10):e1003911. doi:  
403 10.1371/journal.pgen.1003911
- 404 14. Kochinke K, Zweier C, Nijhof B, et al. Systematic Phenomics Analysis Deconvolutes Genes  
405 Mutated in Intellectual Disability into Biologically Coherent Modules. *Am J Hum Genet*  
406 2016;98(1):149-64. doi: 10.1016/j.ajhg.2015.11.024
- 407 15. Robinson MD, McCarthy DJ, Smyth GK. edgeR: a Bioconductor package for differential  
408 expression analysis of digital gene expression data. *Bioinformatics* 2010;26(1):139-40. doi:  
409 10.1093/bioinformatics/btp616
- 410 16. Ritchie ME, Phipson B, Wu D, et al. limma powers differential expression analyses for RNA-  
411 sequencing and microarray studies. *Nucleic Acids Res* 2015;43(7):e47. doi:  
412 10.1093/nar/gkv007
- 413 17. Matilla-Duenas A, Sanchez I, Corral-Juan M, et al. Cellular and molecular pathways triggering  
414 neurodegeneration in the spinocerebellar ataxias. *Cerebellum* 2010;9(2):148-66. doi:  
415 10.1007/s12311-009-0144-2
- 416 18. Crespo-Barreto J, Fryer JD, Shaw CA, et al. Partial loss of ataxin-1 function contributes to  
417 transcriptional dysregulation in spinocerebellar ataxia type 1 pathogenesis. *PLoS Genet*  
418 2010;6(7):e1001021. doi: 10.1371/journal.pgen.1001021
- 419 19. Huang S, Yang S, Guo J, et al. Large Polyglutamine Repeats Cause Muscle Degeneration in  
420 SCA17 Mice. *Cell Rep* 2015;13(1):196-208. doi: 10.1016/j.celrep.2015.08.060
- 421 20. Huang S, Ling JJ, Yang S, et al. Neuronal expression of TATA box-binding protein containing  
422 expanded polyglutamine in knock-in mice reduces chaperone protein response by impairing

- 423 the function of nuclear factor-Y transcription factor. *Brain* 2011;134(Pt 7):1943-58. doi:  
424 10.1093/brain/awr146
- 425 21. Meera P, Pulst SM, Otis TS. Cellular and circuit mechanisms underlying spinocerebellar ataxias.  
426 *J Physiol* 2016;594(16):4653-60. doi: 10.1113/JP271897
- 427 22. Raman IM, Bean BP. Properties of sodium currents and action potential firing in isolated  
428 cerebellar Purkinje neurons. *Ann N Y Acad Sci* 1999;868:93-6.
- 429 23. Burroughs A, Wise AK, Xiao J, et al. The dynamic relationship between cerebellar Purkinje cell  
430 simple spikes and the spikelet number of complex spikes. *J Physiol* 2017;595(1):283-99. doi:  
431 10.1113/JP272259
- 432 24. Mark MD, Schwitalla JC, Groemmke M, et al. Keeping Our Calcium in Balance to Maintain Our  
433 Balance. *Biochem Biophys Res Commun* 2017;483(4):1040-50. doi:  
434 10.1016/j.bbrc.2016.07.020
- 435 25. Shakkottai VG, Chou CH, Oddo S, et al. Enhanced neuronal excitability in the absence of  
436 neurodegeneration induces cerebellar ataxia. *J Clin Invest* 2004;113(4):582-90. doi:  
437 10.1172/JCI20216
- 438 26. Kaufman RJ, Malhotra JD. Calcium trafficking integrates endoplasmic reticulum function with  
439 mitochondrial bioenergetics. *Biochim Biophys Acta* 2014;1843(10):2233-9. doi:  
440 10.1016/j.bbamcr.2014.03.022
- 441 27. Gleichmann M, Mattson MP. Neuronal calcium homeostasis and dysregulation. *Antioxid Redox*  
442 *Signal* 2011;14(7):1261-73. doi: 10.1089/ars.2010.3386
- 443 28. Jeppesen DK, Bohr VA, Stevnsner T. DNA repair deficiency in neurodegeneration. *Prog*  
444 *Neurobiol* 2011;94(2):166-200. doi: 10.1016/j.pneurobio.2011.04.013

- 445 29. Duan Y, Gross RA, Sheu SS. Ca<sup>2+</sup>-dependent generation of mitochondrial reactive oxygen  
446 species serves as a signal for poly(ADP-ribose) polymerase-1 activation during glutamate  
447 excitotoxicity. *J Physiol* 2007;585(Pt 3):741-58. doi: 10.1113/jphysiol.2007.145409
- 448 30. Narciso L, Parlanti E, Racaniello M, et al. The Response to Oxidative DNA Damage in Neurons:  
449 Mechanisms and Disease. *Neural Plast* 2016;2016:3619274. doi: 10.1155/2016/3619274
- 450 31. Akbari M, Morevati M, Croteau D, et al. The role of DNA base excision repair in brain  
451 homeostasis and disease. *DNA Repair (Amst)* 2015;32:172-9. doi:  
452 10.1016/j.dnarep.2015.04.029
- 453 32. Rulten SL, Caldecott KW. DNA strand break repair and neurodegeneration. *DNA Repair (Amst)*  
454 2013;12(8):558-67. doi: 10.1016/j.dnarep.2013.04.008
- 455 33. Gilmore EC. DNA repair abnormalities leading to ataxia: shared neurological phenotypes and  
456 risk factors. *Neurogenetics* 2014;15(4):217-28. doi: 10.1007/s10048-014-0415-z
- 457 34. Madabhushi R, Pan L, Tsai LH. DNA damage and its links to neurodegeneration. *Neuron*  
458 2014;83(2):266-82. doi: 10.1016/j.neuron.2014.06.034
- 459 35. Shiloh Y, Ziv Y. The ATM protein kinase: regulating the cellular response to genotoxic stress,  
460 and more. *Nat Rev Mol Cell Biol* 2013;14(4):197-210.
- 461 36. Bottini AR, Gatti RA, Wrenfeldt M, et al. Heterotopic Purkinje cells in ataxia-telangiectasia.  
462 *Neuropathology* 2012;32(1):23-9. doi: 10.1111/j.1440-1789.2011.01210.x
- 463 37. Guo Z, Kozlov S, Lavin MF, et al. ATM activation by oxidative stress. *Science*  
464 2010;330(6003):517-21. doi: 10.1126/science.1192912

## 465 **Supporting Information**

466 **Table S1:** Processed expression data used for analysis of ataxia gene expression in the developing  
467 human brain.

## 468 **Figure Legends**

469 **Figure 1. Cerebellar Ataxia genes function in common biological processes.** GO-terms  
470 significantly enriched among (A) all ataxia genes, (B) Recessive ataxia genes. (C) Dominant ataxia  
471 genes, (D) Dominant ataxia genes with PolyQ expansion. (All GO-terms passed Bonferoni  
472 correction for multiple testing,  $p < 0.05$ )

473 **Figure 2. Cerebellar Ataxia proteins show high connectivity on protein level and function in**  
474 **common processes.** (A) Interaction network of ataxia proteins. (black solid lines: direct protein  
475 interaction, grey solid lines: proteins with similar domains, dotted lines: interaction of protein with  
476 GO-term) (B) PIE Score of All, Recessive (R), Dominant (D) and PolyQ (PQ) ataxia proteins. (\*\*  
477  $P < 0.001$ , \*\*  $P < 0.01$ , \*  $P < 0.05$ , based on 10,000 random repetitions)

478  
479 **Figure 3. Cerebellar Ataxia gene expression is enriched in the postnatal cerebellum.** (A) 9  
480 developmental stages were used for analysis of developmental human BrainSpan expression data.  
481 (B) Heatmap displaying % of ataxia genes differentially expressed in the cerebellum compared to  
482 indicated amount of other non-cerebellar brain regions for developmental stage 1-9. (C-F) % genes  
483 that show significant enriched expression in the cerebellum compared to 15 other brain regions for  
484 described developmental stages ((C) All ataxia genes, (D) Recessive ataxia genes, (E) Dominant  
485 ataxia genes, (F) Dominant ataxia genes with PolyQ expansion, \*  $P < 0.05$ , \*\*  $P < 0.01$ , \*\*\* $P < 0.001$ ).  
486 (G) Significantly enriched GO-terms for ataxia genes elevated in the cerebellum (red) and ataxia  
487 genes not elevated in the cerebellum (blue).

488  
489 **Figure 4. Ataxia genes can be separated in two distinct clusters based on their temporal**  
490 **expression levels in the cerebellum.** (A) Average RPKM value for ataxia genes present in cluster 1

491 and cluster 2 of Fig 4B, for the indicated developmental stages. (pink: cluster 1, blue: cluster 2, error  
492 bars represent standard deviation) (B) Hierarchical clustering of ataxia gene expression levels during  
493 cerebellar development using Spearman correlation. Data was obtained from BrainSpan and mean  
494 RPKM values were calculated for the indicated developmental stages. Heatmap color-codes are  
495 based on median RPKM value per row (developmental stage), divided by the row standard deviation  
496 (blue: low expression in cerebellum compared to median, red: high expression in cerebellum  
497 compared to median). (C) Significantly enriched GO-terms for Cluster 1 and Cluster 2 from Fig 5B  
498 (All GO-terms passed Bonferoni correction for multiple testing,  $p < 0.05$ ).

499

500 **Figure 5. Ataxia genes can broadly be divided in two themes that affect neuronal homeostasis**  
501 **and when disrupted predispose to progressive cerebellar ataxia.** Module 1: 13 Genes are  
502 specifically elevated in the cerebellum during one or more developmental stages. Of these 13 genes,  
503 7 are linked to Ion/Synapse function and 5 out of these 7 genes showed increased expression during  
504 postnatal cerebellar development compared to prenatal cerebellar development. Module 2: 55 genes  
505 do not show increased expression in the cerebellum. Of these 55 genes, 23 genes are linked to  
506 cellular response to stress and 12 out of these 23 genes show increased expression during prenatal  
507 cerebellar development compared to postnatal cerebellar development (data displayed in Fig 2-4).



**A**

**Recessive Cerebellar Ataxias**

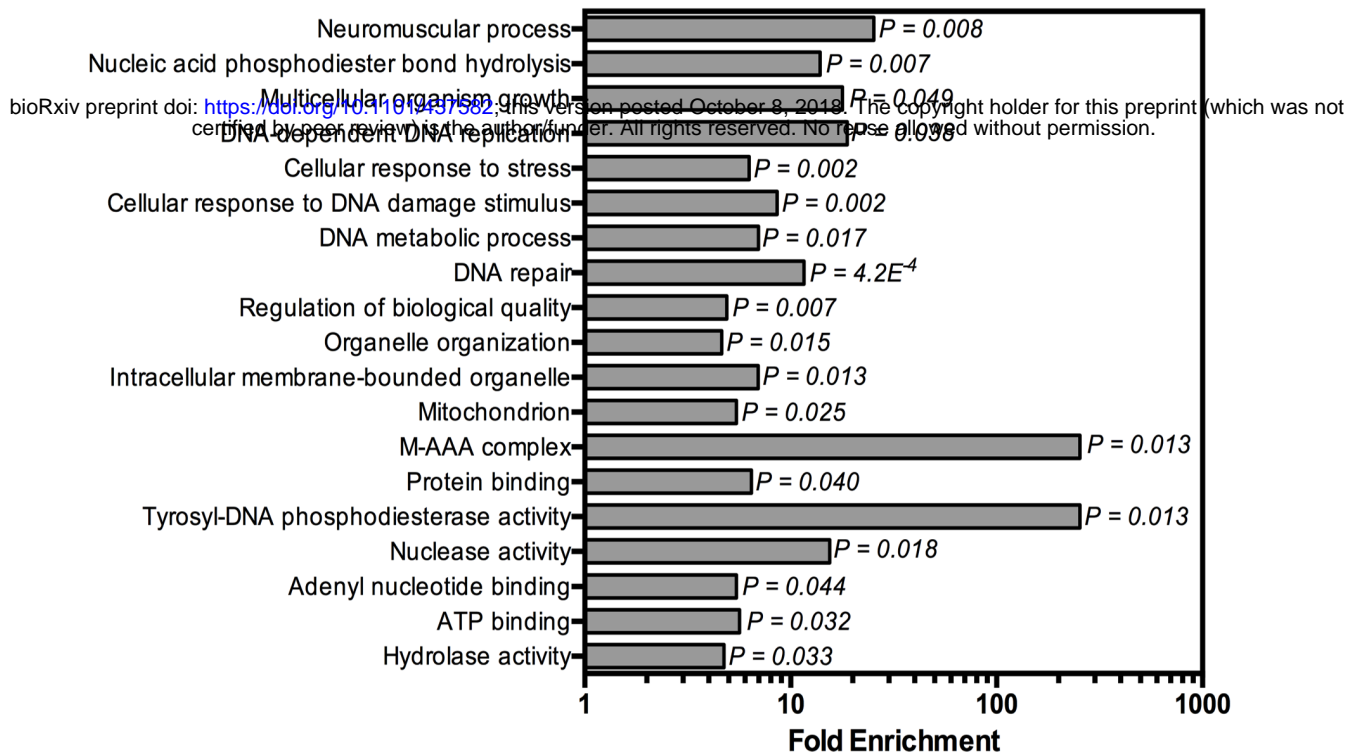

**B**

**Autosomal Dominant Cerebellar Ataxias**

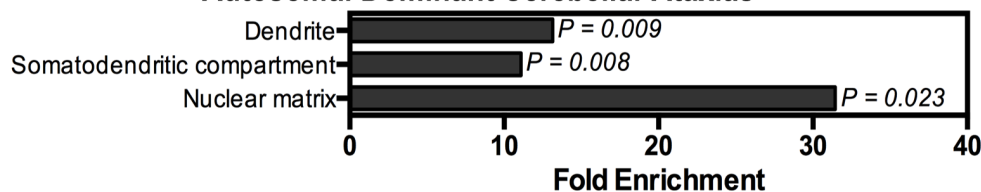

**C**

**Autosomal Dominant Cerebellar Ataxias with PolyQ expansion**

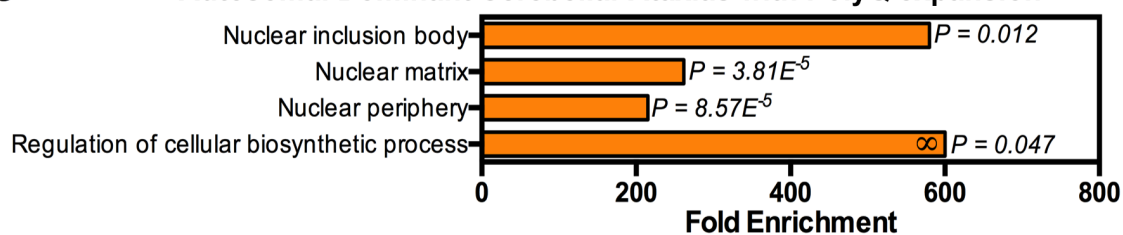

**D**

**All Cerebellar Ataxias**

**Recessive**

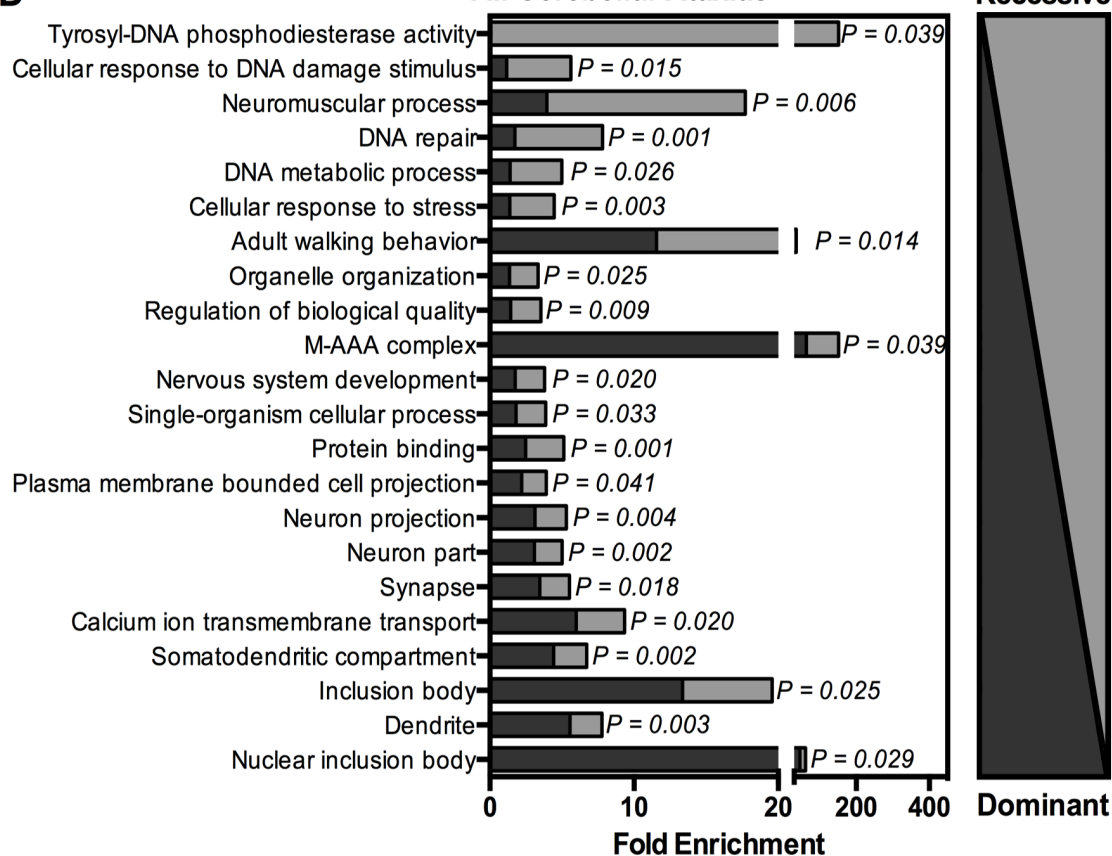

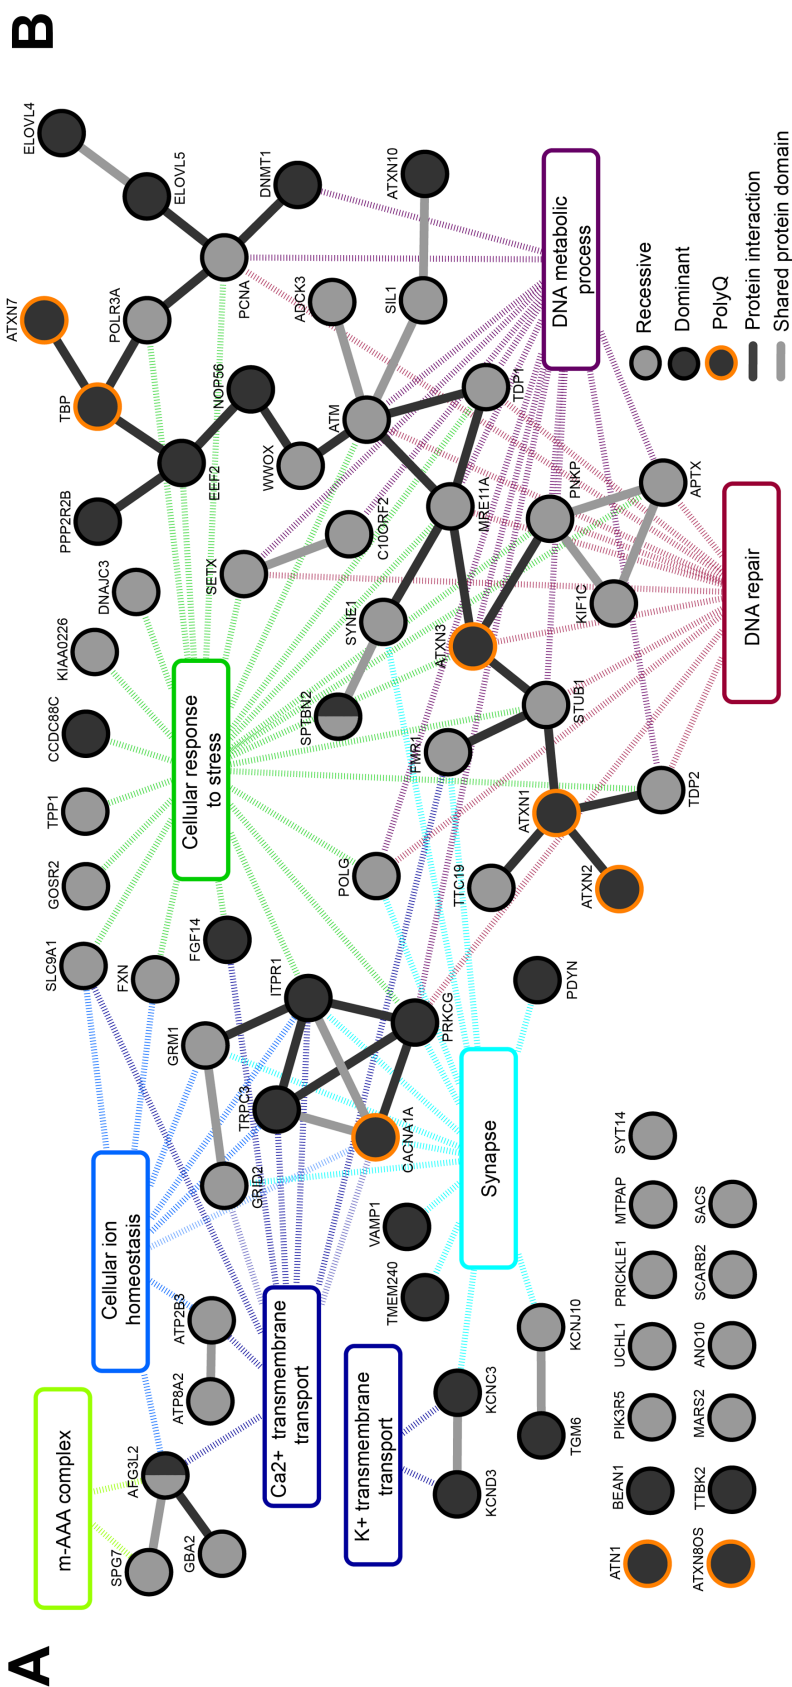

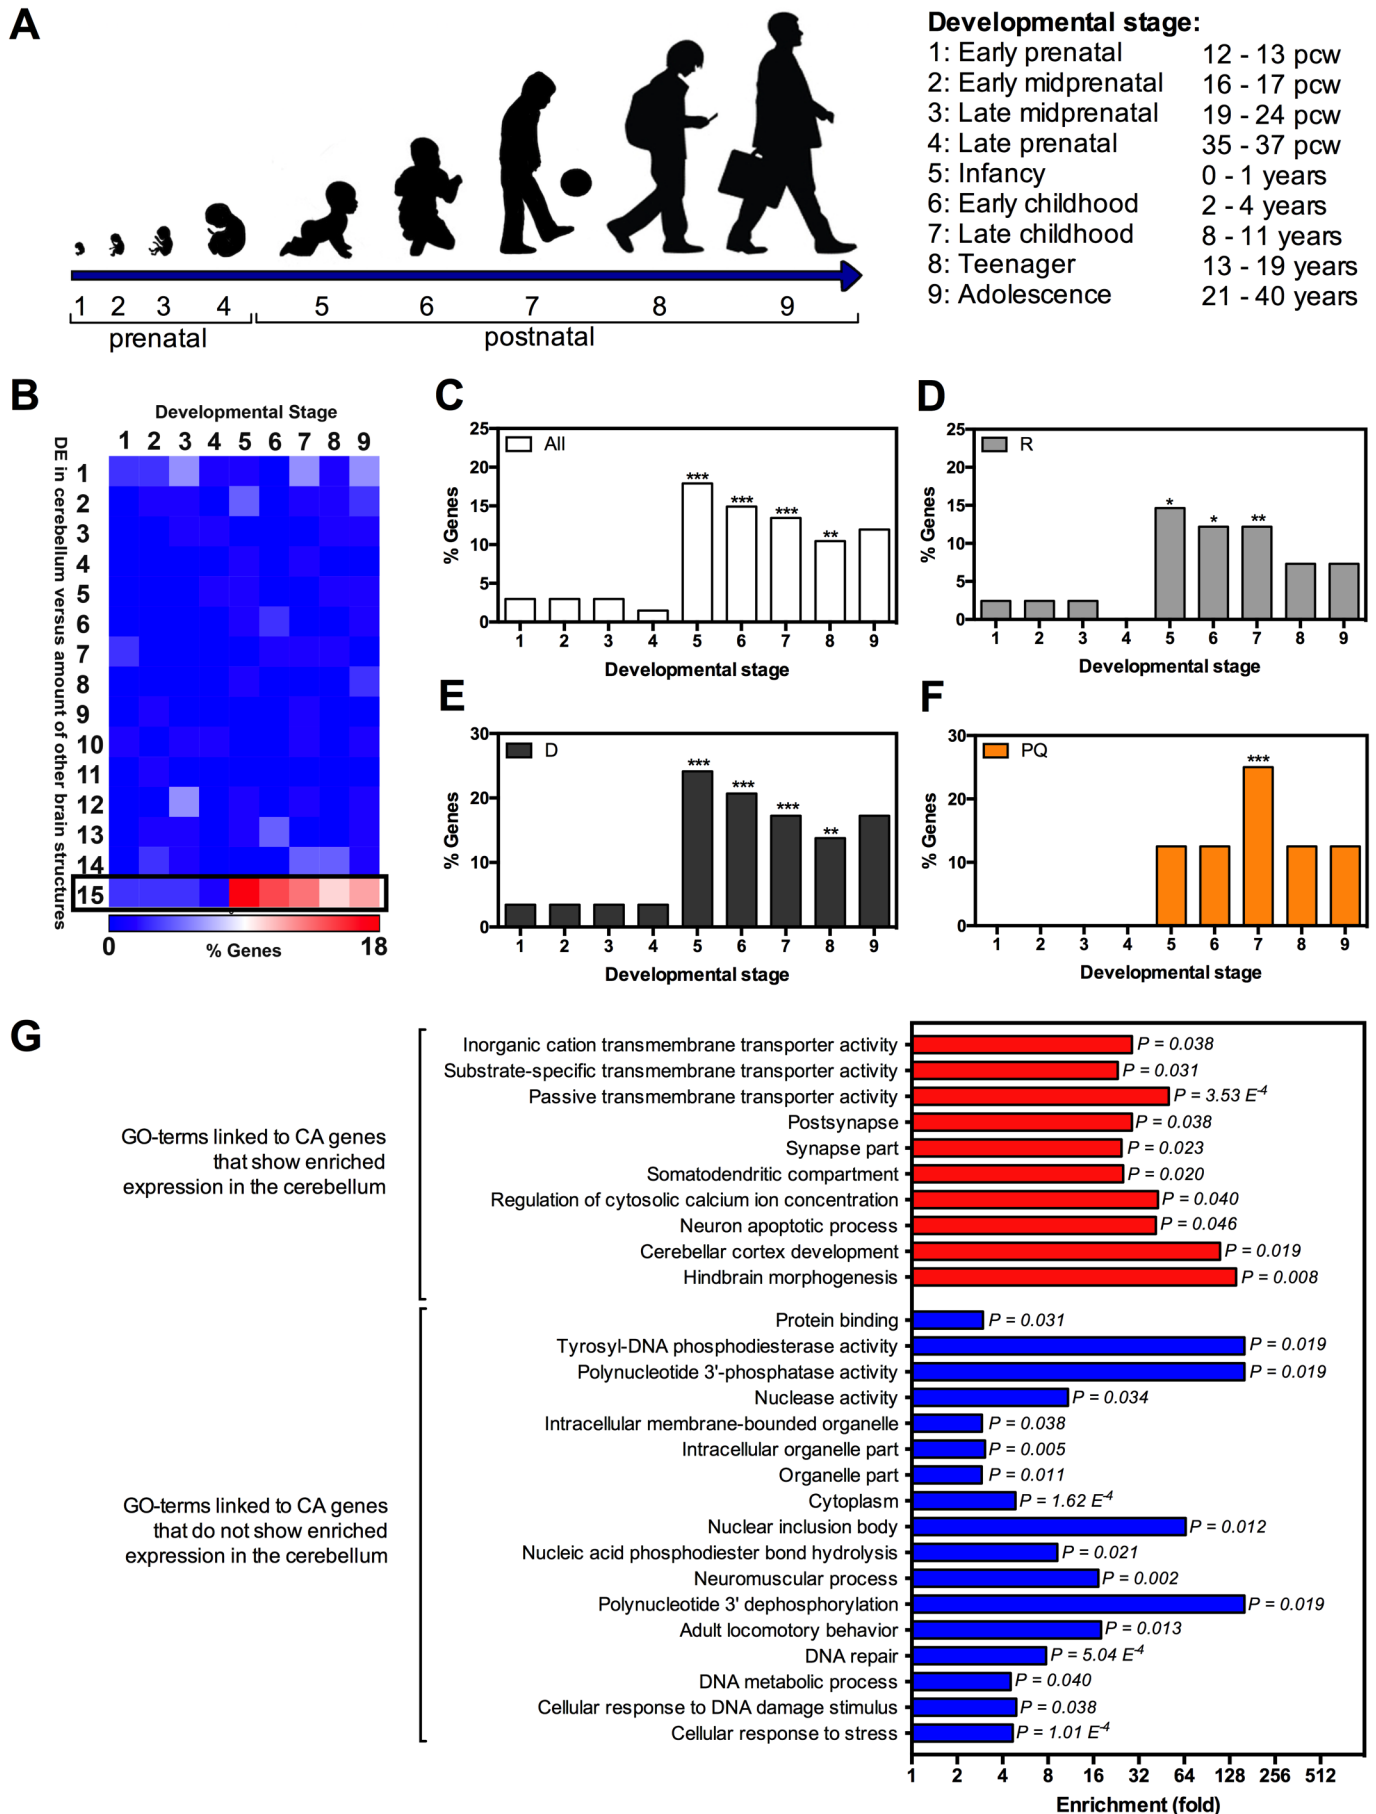

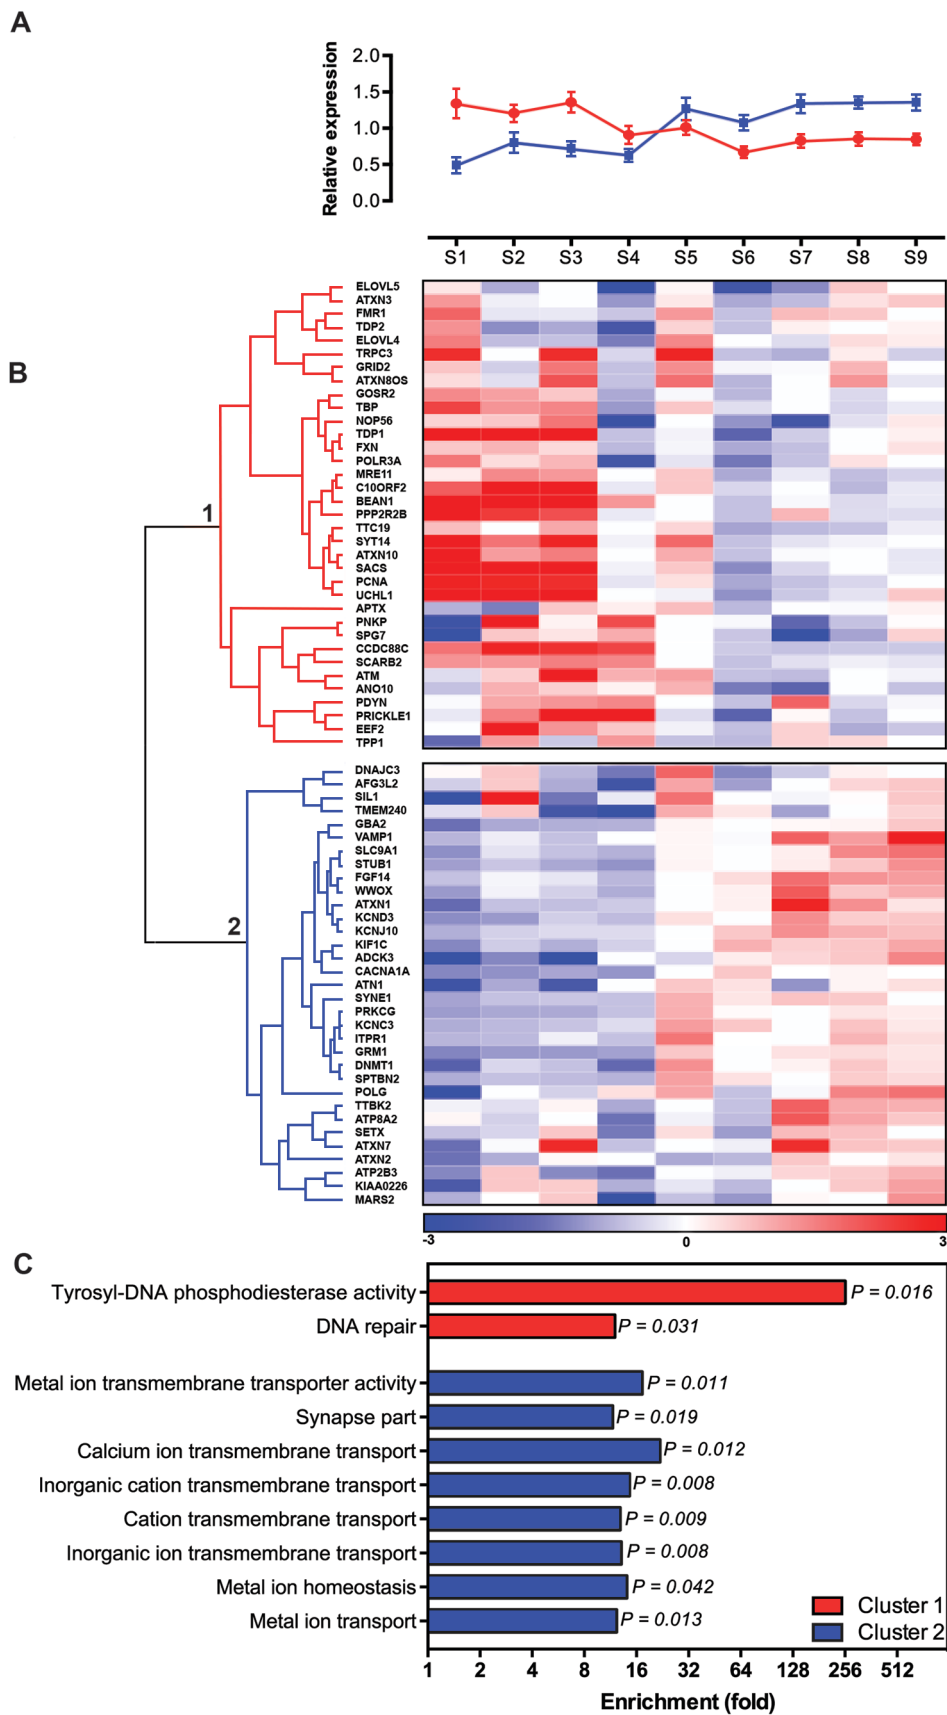

## Module 1

## Module 2

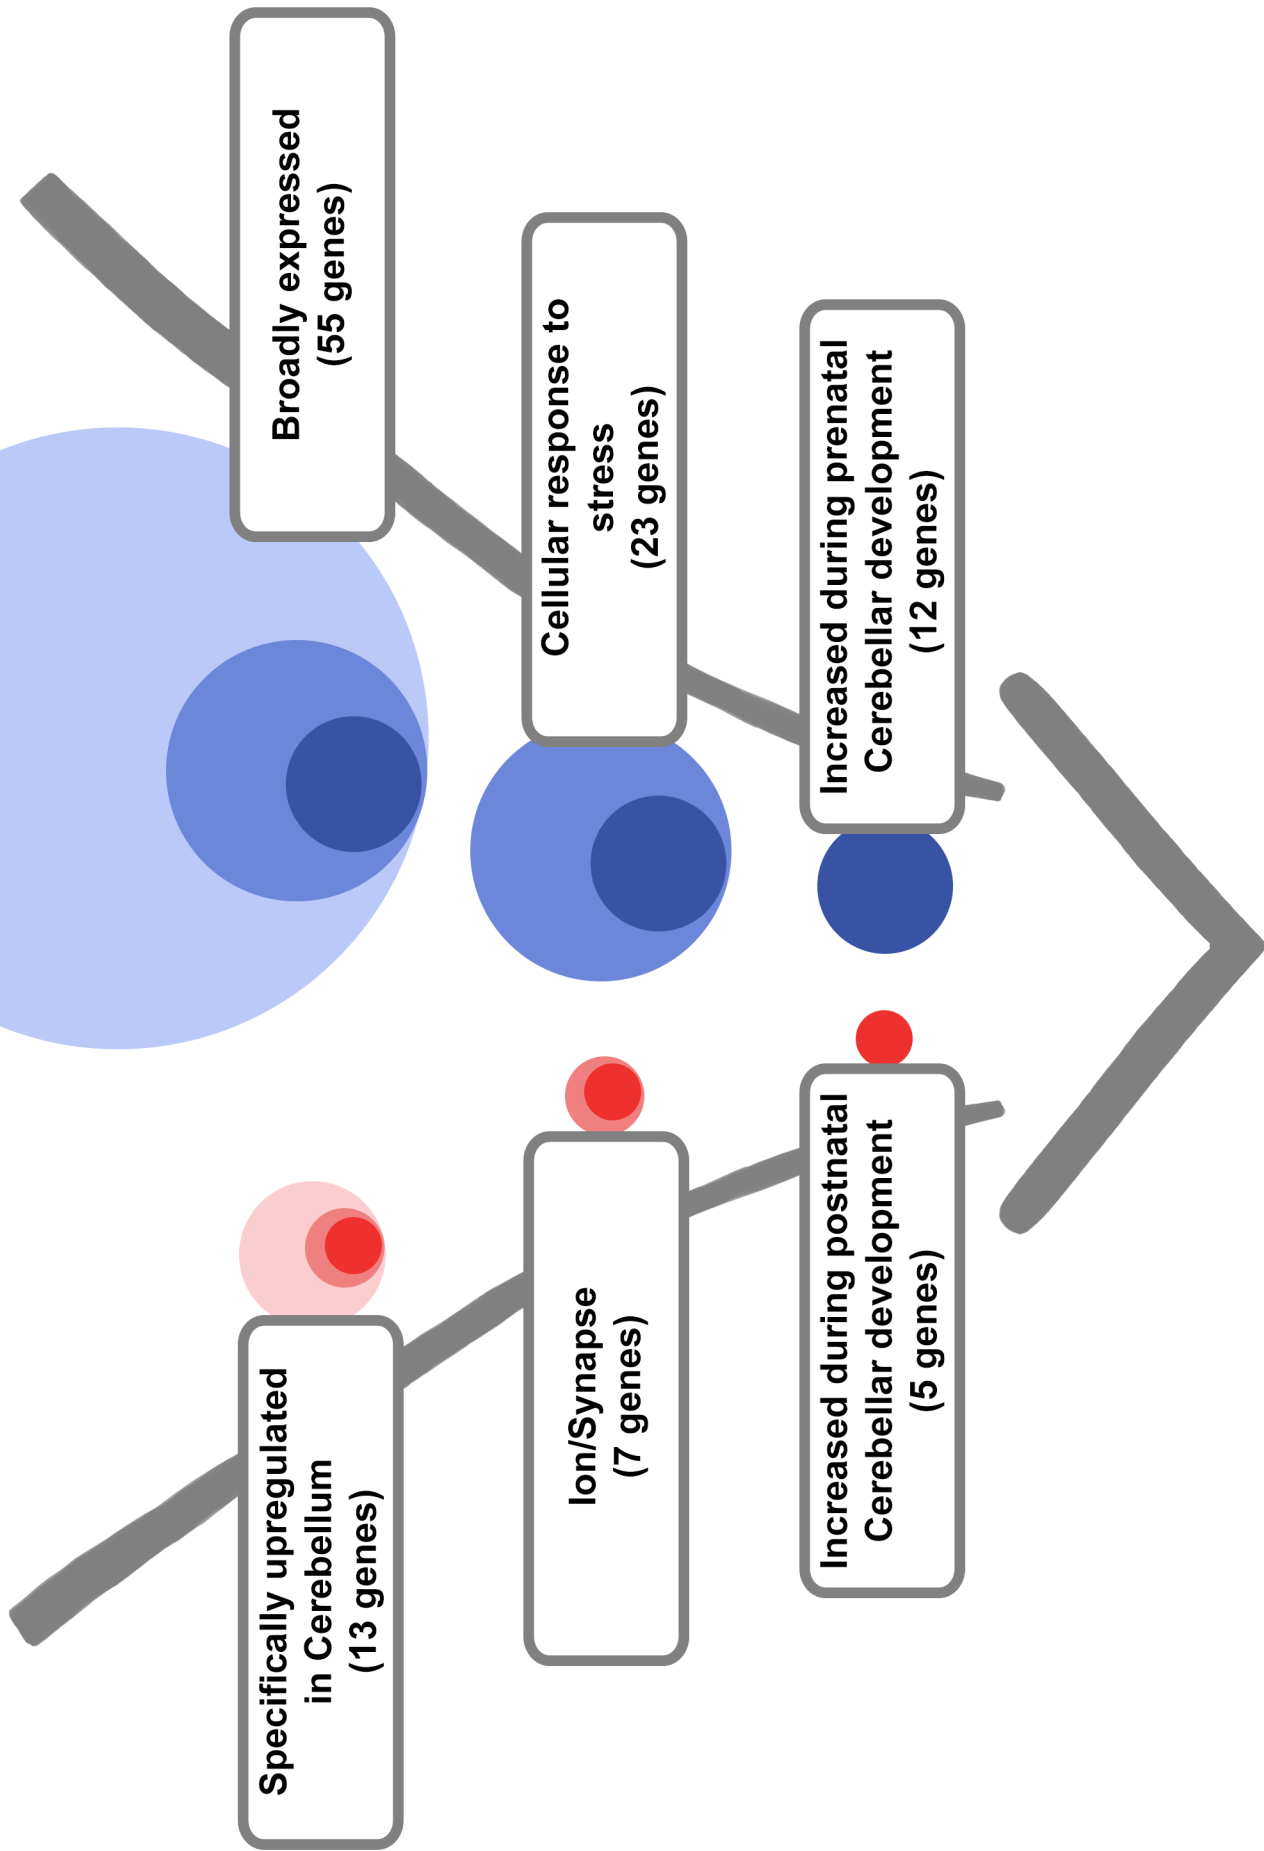

Source: https://www.biorxiv.org/content/biorxiv/early/2018/10/08/437582.full.pdf
